# Supplementary material for: Incidence of Myocardial Injury in COVID-19-Infected Patients: A Systematic Review and Meta-Analysis
Source: MDPI journal article supplement (doi:10.3390/diseases8040040), 2020-10-27
Supplement: s1 [file s1]

## Supplementary data

### **Item 1. Search Strategy**

#### **Search term for OVID Medline**

1. exp Coronavirus Infections/ or COVID.mp.
2. limit 1 to humans
3. exp Myocardial Ischemia/ or myocardial.mp.
4. 1 and 3

#### **Search terms for EMBASE**

| No. | Query                                          |
|-----|------------------------------------------------|
| #13 | #11 AND 2020:py AND 'coronavirus infection'/dm |
| #12 | #11 AND 2020:py                                |
| #11 | #1 AND #10                                     |
| #10 | #2 OR #9                                       |
| #9  | #5 OR #8                                       |
| #8  | #4 AND #7                                      |
| #7  | #3 OR #6                                       |
| #6  | myocardial                                     |
| #5  | troponin                                       |
| #4  | injury                                         |
| #3  | cardiac                                        |
| #2  | clinical                                       |
| #1  | 'covid' OR 'corona'                            |

#### **Database: PubMed**

("COVID" OR "corona") AND ("clinical" OR "myocardial" OR "cardiac" OR "injury")

**Search strategy**

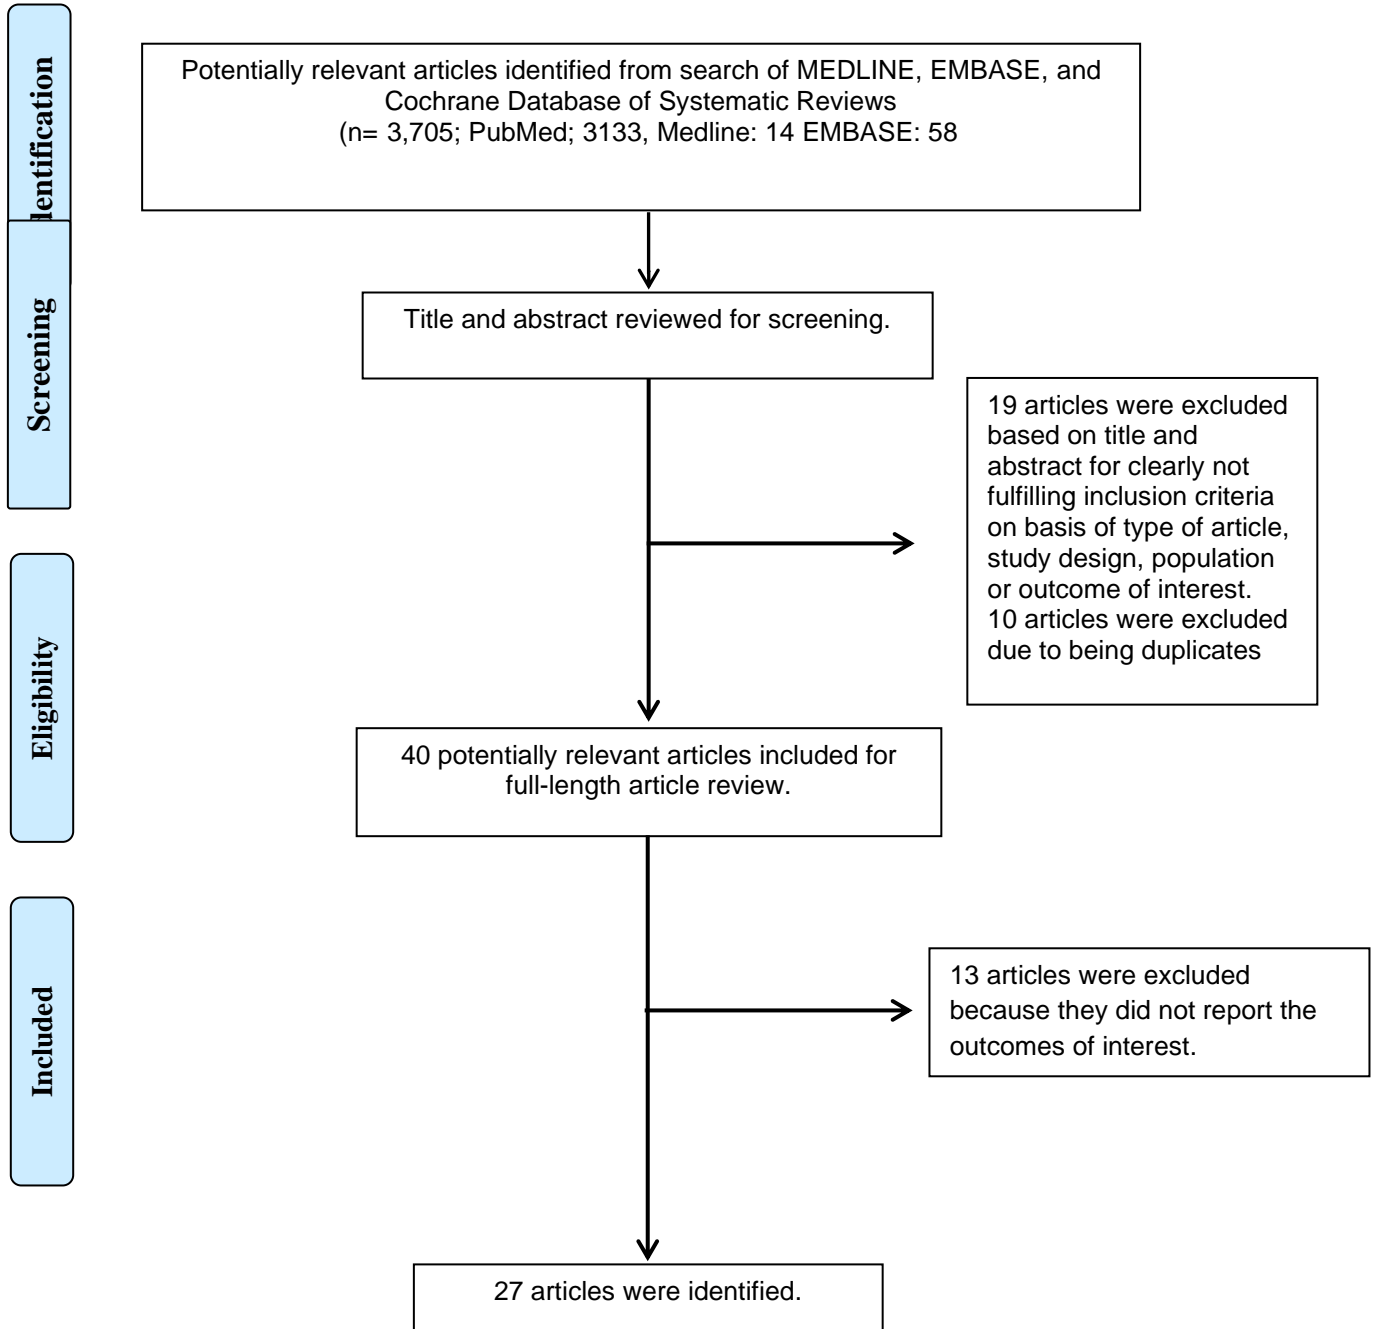

### Supplement Table 1: Newcastle-Ottawa quality assessment scale of included studies in meta-analysis

Notes: The Newcastle-Ottawa scale uses a star system (0 to 9) to evaluate included studies on 3 domains: selection, comparability, and outcomes. Star (\*)= item presents. Maximum 1 star (\*) for selection and outcome components and 2 stars (\*\*) for comparability components. Higher scores represent higher study quality.

| Study                  | Selection                        |                                     |                           |                               | Comparability               | Outcome               |                    |                    | Total |
|------------------------|----------------------------------|-------------------------------------|---------------------------|-------------------------------|-----------------------------|-----------------------|--------------------|--------------------|-------|
|                        | Representative of exposed cohort | Selection of the non-exposed cohort | Ascertainment of exposure | Endpoint not present at start | Comparability (Confounding) | Assessment of Outcome | Follow-up duration | Adequacy follow-up |       |
| He <sup>1</sup>        | *                                | *                                   | *                         | *                             |                             | *                     |                    | *                  | 6     |
| Huang <sup>2</sup>     | *                                | *                                   | *                         | *                             | *                           | *                     | *                  | *                  | 8     |
| Wang <sup>3</sup>      | *                                | *                                   | *                         | *                             | *                           | *                     |                    | *                  | 7     |
| Zhou <sup>4</sup>      | *                                | *                                   | *                         | *                             | *                           | *                     | *                  | *                  | 8     |
| Liu <sup>5</sup>       | *                                | *                                   | *                         | *                             | *                           | *                     |                    |                    | 5     |
| Chen <sup>6</sup>      | *                                | *                                   | *                         | *                             |                             | *                     |                    | *                  | 6     |
| Shi <sup>7</sup>       | *                                | *                                   | *                         | *                             |                             | *                     |                    | *                  | 6     |
| Deng <sup>8</sup>      | *                                | *                                   | *                         | *                             |                             | *                     |                    | *                  | 6     |
| Yang <sup>9</sup>      | *                                | *                                   | *                         | *                             |                             | *                     |                    |                    | 5     |
| Wan <sup>10</sup>      | *                                | *                                   | *                         | *                             |                             | *                     |                    | *                  | 6     |
| Cao <sup>11</sup>      | *                                | *                                   | *                         | *                             |                             | *                     |                    |                    | 5     |
| Guo <sup>12</sup>      | *                                | *                                   | *                         | *                             |                             | *                     | *                  | *                  | 7     |
| Tao <sup>13</sup>      | *                                | *                                   | *                         | *                             |                             | *                     |                    |                    | 5     |
| Tu <sup>14</sup>       | *                                | *                                   | *                         | *                             |                             | *                     |                    |                    | 5     |
| Du <sup>15</sup>       | *                                | *                                   | *                         | *                             | *                           | *                     |                    | *                  | 6     |
| Xu <sup>16</sup>       | *                                | *                                   | *                         | *                             | *                           | *                     |                    | *                  | 6     |
| Wu <sup>17</sup>       | *                                | *                                   | *                         | *                             | *                           | *                     |                    | *                  | 6     |
| Wei <sup>18</sup>      | *                                | *                                   | *                         | *                             |                             | *                     |                    |                    | 5     |
| Ni <sup>19</sup>       | *                                | *                                   | *                         | *                             | *                           | *                     |                    | *                  | 6     |
| Li <sup>20</sup>       | *                                | *                                   | *                         | *                             | *                           | *                     |                    | *                  | 6     |
| Yu <sup>21</sup>       | *                                | *                                   | *                         | *                             | *                           | *                     |                    |                    | 5     |
| Feng <sup>22</sup>     | *                                | *                                   | *                         | *                             | *                           | *                     |                    |                    | 6     |
| Lombardi <sup>23</sup> | *                                | *                                   | *                         | *                             | *                           | *                     | *                  | *                  | 8     |
| Javani <sup>24</sup>   | *                                | *                                   | *                         | *                             |                             | *                     |                    |                    | 5     |
| Saleh <sup>25</sup>    | *                                | *                                   | *                         | *                             |                             | *                     |                    |                    | 5     |

|                          |   |   |   |   |   |   |   |   |   |
|--------------------------|---|---|---|---|---|---|---|---|---|
| Chung <sup>26</sup>      | * | * | * | * |   | * |   |   | 5 |
| Richardson <sup>27</sup> | * | * | * | * | * | * | * | * | 8 |

## Overall result

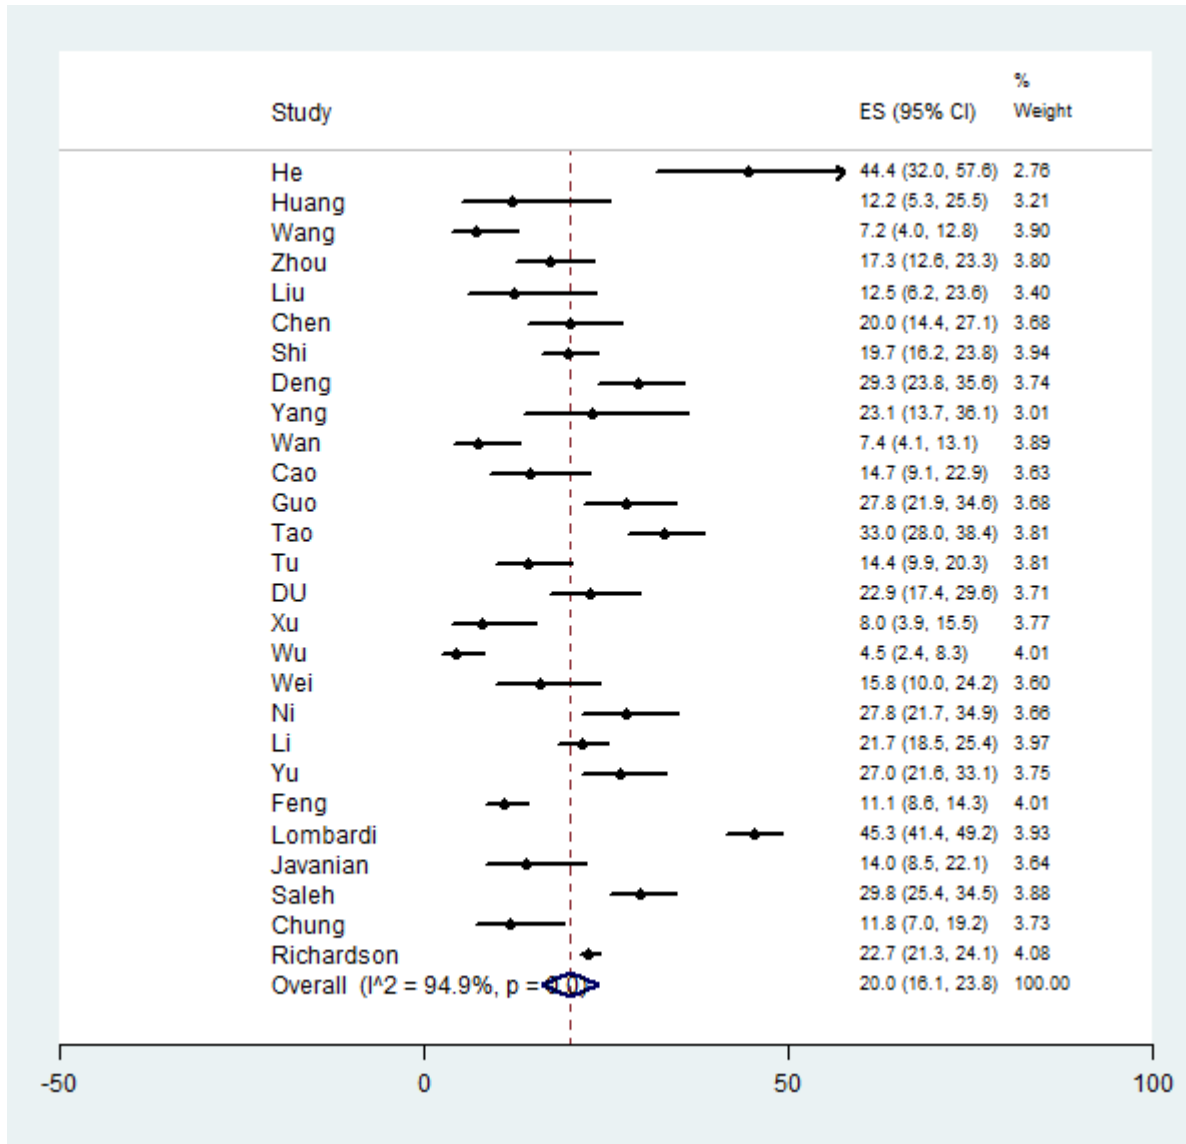

## Meta-regression

### By hypertension

```
.. metareg _ES hypertension, wsse(_seES) graph
```

```
Meta-regression           Number of obs =   26
REML estimate of between-study variance      tau2      = .004923
% residual variation due to heterogeneity    I-squared_res = 91.35%
Proportion of between-study variance explained  Adj R-squared =
50.87%
With Knapp-Hartung modification
```

```
-----+-----
      _ES |   Coef.  Std. Err.   t  P>|t|  [95% Conf. Interval]
-----+-----
hypertension | .0054781  .0012524   4.37  0.000   .0028933   .0080629
      _cons | .0240741  .0427272   0.56  0.578  -.0641105   .1122587
-----+-----
```

```
.
end of do-file
```

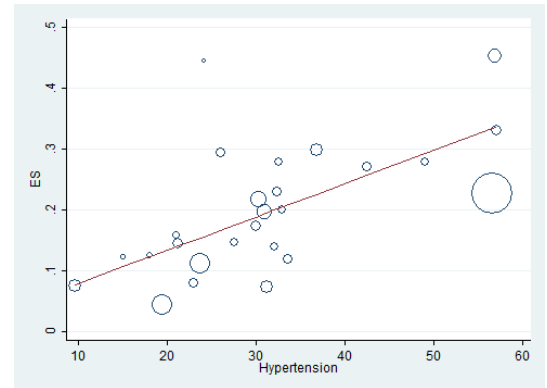

### By age

```
.. metareg _ES meanage, wsse(_seES) graph
```

```
Meta-regression           Number of obs =   27
REML estimate of between-study variance      tau2      = .003988
% residual variation due to heterogeneity    I-squared_res = 86.83%
Proportion of between-study variance explained  Adj R-squared = 58.87%
With Knapp-Hartung modification
```

```
-----+-----
      _ES |   Coef.  Std. Err.   t  P>|t|  [95% Conf. Interval]
-----+-----
meanage | .0131335  .0023261   5.65  0.000   .0083428   .0179242
      _cons | -.5634105  .1356138  -4.15  0.000  -.8427124  -.2841086
-----+-----
```

```
.
end of do-file
```

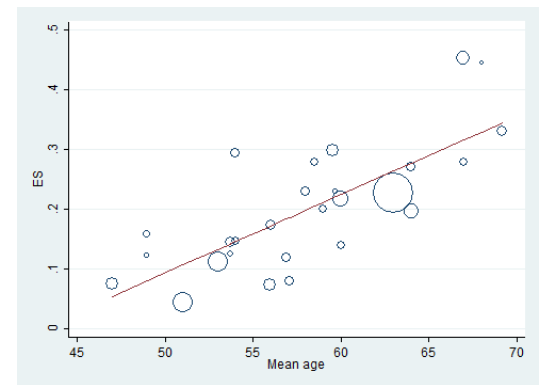

```
. do "C:\Users\narut\AppData\Local\Temp\STD00000000.tmp"
```

### By sex (Male)

```
.. metareg _ES sexmale, wsse(_seES) graph
```

```
Meta-regression           Number of obs = 25
REML estimate of between-study variance      tau2 = .007419
% residual variation due to heterogeneity    I-squared_res = 94.45%
Proportion of between-study variance explained  Adj R-squared = 15.56%
With Knapp-Hartung modification
```

| _ES     | Coef.     | Std. Err. | t     | P> t  | [95% Conf. Interval] |
|---------|-----------|-----------|-------|-------|----------------------|
| sexmale | .0050751  | .0023335  | 2.17  | 0.040 | .0002479 .0099024    |
| _cons   | -.0929421 | .13121    | -0.71 | 0.486 | -.3643706 .1784865   |

```
end of do-file
```

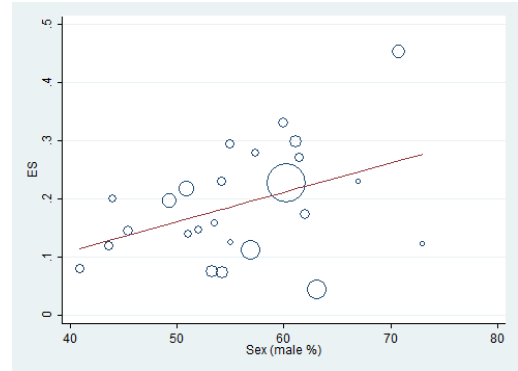

```
. do "C:\Users\narut\AppData\Local\Temp\STD00000000.tmp"
```

## By diabetes

```
.. metareg _ES dm, wsse(_seES) graph
```

```
Meta-regression           Number of obs = 27
REML estimate of between-study variance      tau2 = .006805
% residual variation due to heterogeneity    I-squared_res = 92.57%
Proportion of between-study variance explained  Adj R-squared = 29.82%
With Knapp-Hartung modification
```

| _ES   | Coef.     | Std. Err. | t    | P> t  | [95% Conf. Interval] |
|-------|-----------|-----------|------|-------|----------------------|
| dm    | .0062494  | .0020571  | 3.04 | 0.006 | .0020128 .0104861    |
| _cons | -.0905798 | .0398137  | 2.28 | 0.032 | -.0085819 .1725777   |

```
end of do-file
```

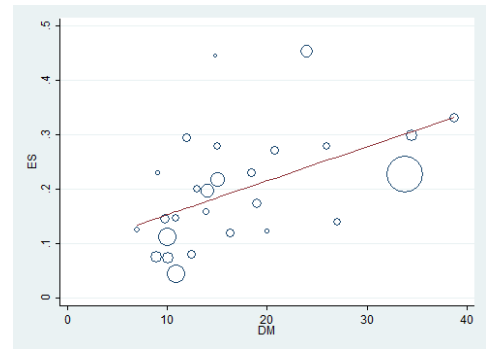

```
. do "C:\Users\narut\AppData\Local\Temp\STD00000000.tmp"
```

## By coronary heart disease

```
.. metareg _ES chd, wsse(_seES) graph
```

```
Meta-regression           Number of obs = 27
REML estimate of between-study variance      tau2 = .007611
% residual variation due to heterogeneity    I-squared_res = 92.60%
Proportion of between-study variance explained  Adj R-squared = 21.50%
With Knapp-Hartung modification
```

| _ES   | Coef.    | Std. Err. | t    | P> t  | [95% Conf. Interval] |
|-------|----------|-----------|------|-------|----------------------|
| chd   | .0066804 | .0027627  | 2.42 | 0.023 | .0009905 .0123703    |
| _cons | .1231423 | .0365366  | 3.37 | 0.002 | .0478939 .1983908    |

```
end of do-file
```

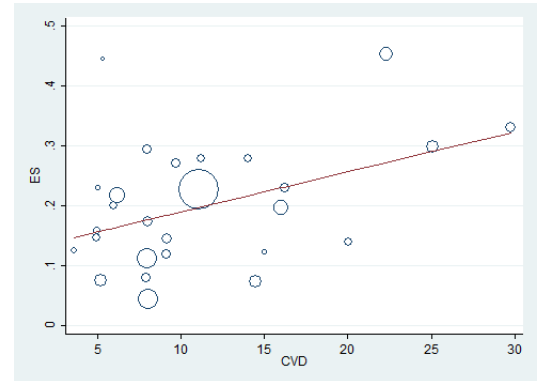

```
. do "C:\Users\narut\AppData\Local\Temp\STD00000000.tmp"
```

## By CKD

```
.. metareg _ES ckd, wsse(_seES) graph
```

```
Meta-regression          Number of obs = 14
REML estimate of between-study variance      tau2 = .007579
% residual variation due to heterogeneity    I-squared_res = 92.82%
Proportion of between-study variance explained  Adj R-squared = 23.39%
With Knapp-Hartung modification
```

| _ES   | Coef.    | Std. Err. | t    | P> t  | [95% Conf. Interval] |
|-------|----------|-----------|------|-------|----------------------|
| ckd   | .010586  | .0050606  | 2.09 | 0.058 | -.00044 .0216121     |
| _cons | .1693508 | .0338024  | 5.01 | 0.000 | .0957017 .2429998    |

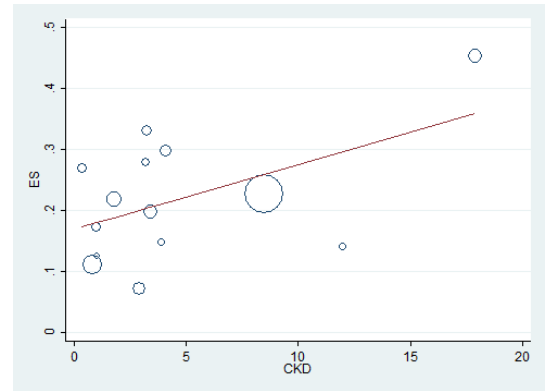

## By region

```
.. metareg _ES nation, wsse(_seES) graph
```

```
Meta-regression          Number of obs = 27
REML estimate of between-study variance      tau2 = .009586
% residual variation due to heterogeneity    I-squared_res = 94.42%
Proportion of between-study variance explained  Adj R-squared = 1.13%
With Knapp-Hartung modification
```

| _ES    | Coef.    | Std. Err. | t    | P> t  | [95% Conf. Interval] |
|--------|----------|-----------|------|-------|----------------------|
| nation | .0269995 | .0255686  | 1.06 | 0.301 | -.0256601 .0796591   |
| _cons  | .1644963 | .0390281  | 4.21 | 0.000 | .0841164 .2448762    |

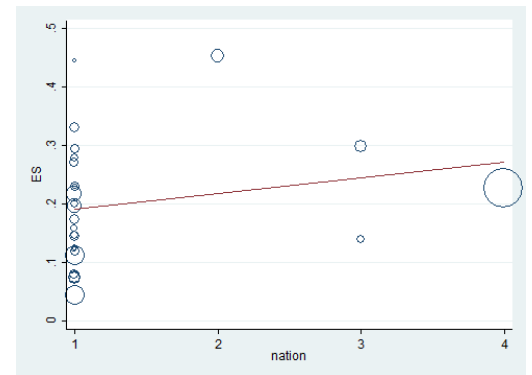

end of do-file

```
.. do "C:\Users\narut\AppData\Local\Temp\STD00000000.tmp"
```

## By race

```
.. metareg _ES race, wsse(_seES) graph
```

```
Meta-regression          Number of obs = 27
REML estimate of between-study variance      tau2 = .00933
% residual variation due to heterogeneity    I-squared_res = 93.71%
Proportion of between-study variance explained  Adj R-squared = 3.78%
With Knapp-Hartung modification
```

| _ES   | Coef.    | Std. Err. | t    | P> t  | [95% Conf. Interval] |
|-------|----------|-----------|------|-------|----------------------|
| race  | .0436455 | .034542   | 1.26 | 0.218 | -.0274951 .1147861   |
| _cons | .146169  | .0468765  | 3.12 | 0.005 | .049625 .2427129     |

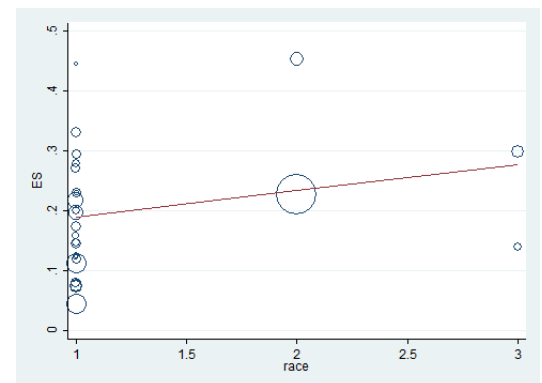

## References

1. He XW, Lai JS, Cheng J, et al. [Impact of complicated myocardial injury on the clinical outcome of severe or critically ill COVID-19 patients]. *Zhonghua Xin Xue Guan Bing Za Zhi*. 2020;48(6):456-460.
2. Huang C, Wang Y, Li X, et al. Clinical features of patients infected with 2019 novel coronavirus in Wuhan, China. *Lancet*. 2020;395(10223):497-506.
3. Wang D, Hu B, Hu C, et al. Clinical Characteristics of 138 Hospitalized Patients With 2019 Novel Coronavirus-Infected Pneumonia in Wuhan, China. *JAMA*. 2020;323(11):1061-1069.
4. Zhou F, Yu T, Du R, et al. Clinical course and risk factors for mortality of adult inpatients with COVID-19 in Wuhan, China: a retrospective cohort study. *Lancet*. 2020;395(10229):1054-1062.
5. Liu K, Chen Y, Lin R, Han K. Clinical features of COVID-19 in elderly patients: A comparison with young and middle-aged patients. *J Infect*. 2020;80(6):e14-e18.
6. Chen C, Chen C, Yan JT, Zhou N, Zhao JP, Wang DW. [Analysis of myocardial injury in patients with COVID-19 and association between concomitant cardiovascular diseases and severity of COVID-19]. *Zhonghua Xin Xue Guan Bing Za Zhi*. 2020;48(7):567-571.
7. Shi S, Qin M, Shen B, et al. Association of Cardiac Injury With Mortality in Hospitalized Patients With COVID-19 in Wuhan, China. *JAMA Cardiol*. 2020;5(7):802-810.
8. Deng Y, Liu W, Liu K, et al. Clinical characteristics of fatal and recovered cases of coronavirus disease 2019 in Wuhan, China: a retrospective study. *Chin Med J (Engl)*. 2020;133(11):1261-1267.
9. Yang X, Yu Y, Xu J, et al. Clinical course and outcomes of critically ill patients with SARS-CoV-2 pneumonia in Wuhan, China: a single-centered, retrospective, observational study. *Lancet Respir Med*. 2020;8(5):475-481.
10. Wan S, Xiang Y, Fang W, et al. Clinical features and treatment of COVID-19 patients in northeast Chongqing. *J Med Virol*. 2020;92(7):797-806.
11. Cao J, Hu X, Cheng W, Yu L, Tu WJ, Liu Q. Clinical features and short-term outcomes of 18 patients with corona virus disease 2019 in intensive care unit. *Intensive Care Med*. 2020;46(5):851-853.
12. Guo T, Fan Y, Chen M, et al. Cardiovascular Implications of Fatal Outcomes of Patients With Coronavirus Disease 2019 (COVID-19). *JAMA Cardiol*. 2020;5(7):811-818.
13. Li T, Lu L, Zhang W, et al. Clinical characteristics of 312 hospitalized older patients with COVID-19 in Wuhan, China. *Arch Gerontol Geriatr*. 2020;91:104185.
14. Tu WJ, Cao J, Yu L, Hu X, Liu Q. Clinicolaboratory study of 25 fatal cases of COVID-19 in Wuhan. *Intensive Care Med*. 2020;46(6):1117-1120.
15. Du RH, Liang LR, Yang CQ, et al. Predictors of mortality for patients with COVID-19 pneumonia caused by SARS-CoV-2: a prospective cohort study. *Eur Respir J*. 2020;55(5).
16. Xu X, Yu MQ, Shen Q, et al. Analysis of inflammatory parameters and disease severity for 88 hospitalized COVID-19 patients in Wuhan, China. *Int J Med Sci*. 2020;17(13):2052-2062.
17. Wu C, Chen X, Cai Y, et al. Risk Factors Associated With Acute Respiratory Distress Syndrome and Death in Patients With Coronavirus Disease 2019 Pneumonia in Wuhan, China. *JAMA Intern Med*. 2020;180(7):934-943.



18. Wei JF, Huang FY, Xiong TY, et al. Acute myocardial injury is common in patients with COVID-19 and impairs their prognosis. *Heart*. 2020;106(15):1154-1159.
19. Ni W, Yang X, Liu J, et al. Acute Myocardial Injury at Hospital Admission Is Associated With All-Cause Mortality in COVID-19. *J Am Coll Cardiol*. 2020;76(1):124-125.
20. Li X, Xu S, Yu M, et al. Risk factors for severity and mortality in adult COVID-19 inpatients in Wuhan. *J Allergy Clin Immunol*. 2020;146(1):110-118.
21. Yu Y, Xu D, Fu S, et al. Patients with COVID-19 in 19 ICUs in Wuhan, China: a cross-sectional study. *Crit Care*. 2020;24(1):219.
22. Feng Y, Ling Y, Bai T, et al. COVID-19 with Different Severities: A Multicenter Study of Clinical Features. *Am J Respir Crit Care Med*. 2020;201(11):1380-1388.
23. Lombardi CM, Carubelli V, Iorio A, et al. Association of Troponin Levels With Mortality in Italian Patients Hospitalized With Coronavirus Disease 2019: Results of a Multicenter Study. *JAMA Cardiol*. 2020.
24. Javanian M, Bayani M, Shokri M, et al. Clinical and laboratory findings from patients with COVID-19 pneumonia in Babol North of Iran: a retrospective cohort study. *Rom J Intern Med*. 2020;58(3):161-167.
25. Karbalai Saleh S, Oraii A, Soleimani A, et al. The association between cardiac injury and outcomes in hospitalized patients with COVID-19. *Intern Emerg Med*. 2020.
26. Chung SM, Ahn JH, Moon JS. Response: The Risk of Diabetes on Clinical Outcomes in Patients with Coronavirus Disease 2019: A Retrospective Cohort Study (Diabetes Metab J 2020;44:405-13). *Diabetes Metab J*. 2020;44(4):625-626.
27. Richardson S, Hirsch JS, Narasimhan M, et al. Presenting Characteristics, Comorbidities, and Outcomes Among 5700 Patients Hospitalized With COVID-19 in the New York City Area. *JAMA*. 2020;323(20):2052-2059.
